# Supplementary material
Source: bioRxiv or medRxiv preprint supplement (https://www.biorxiv.org/highwire/filestream/35469/field_highwire_adjunct_files/0/077701-1.pdf)

**A**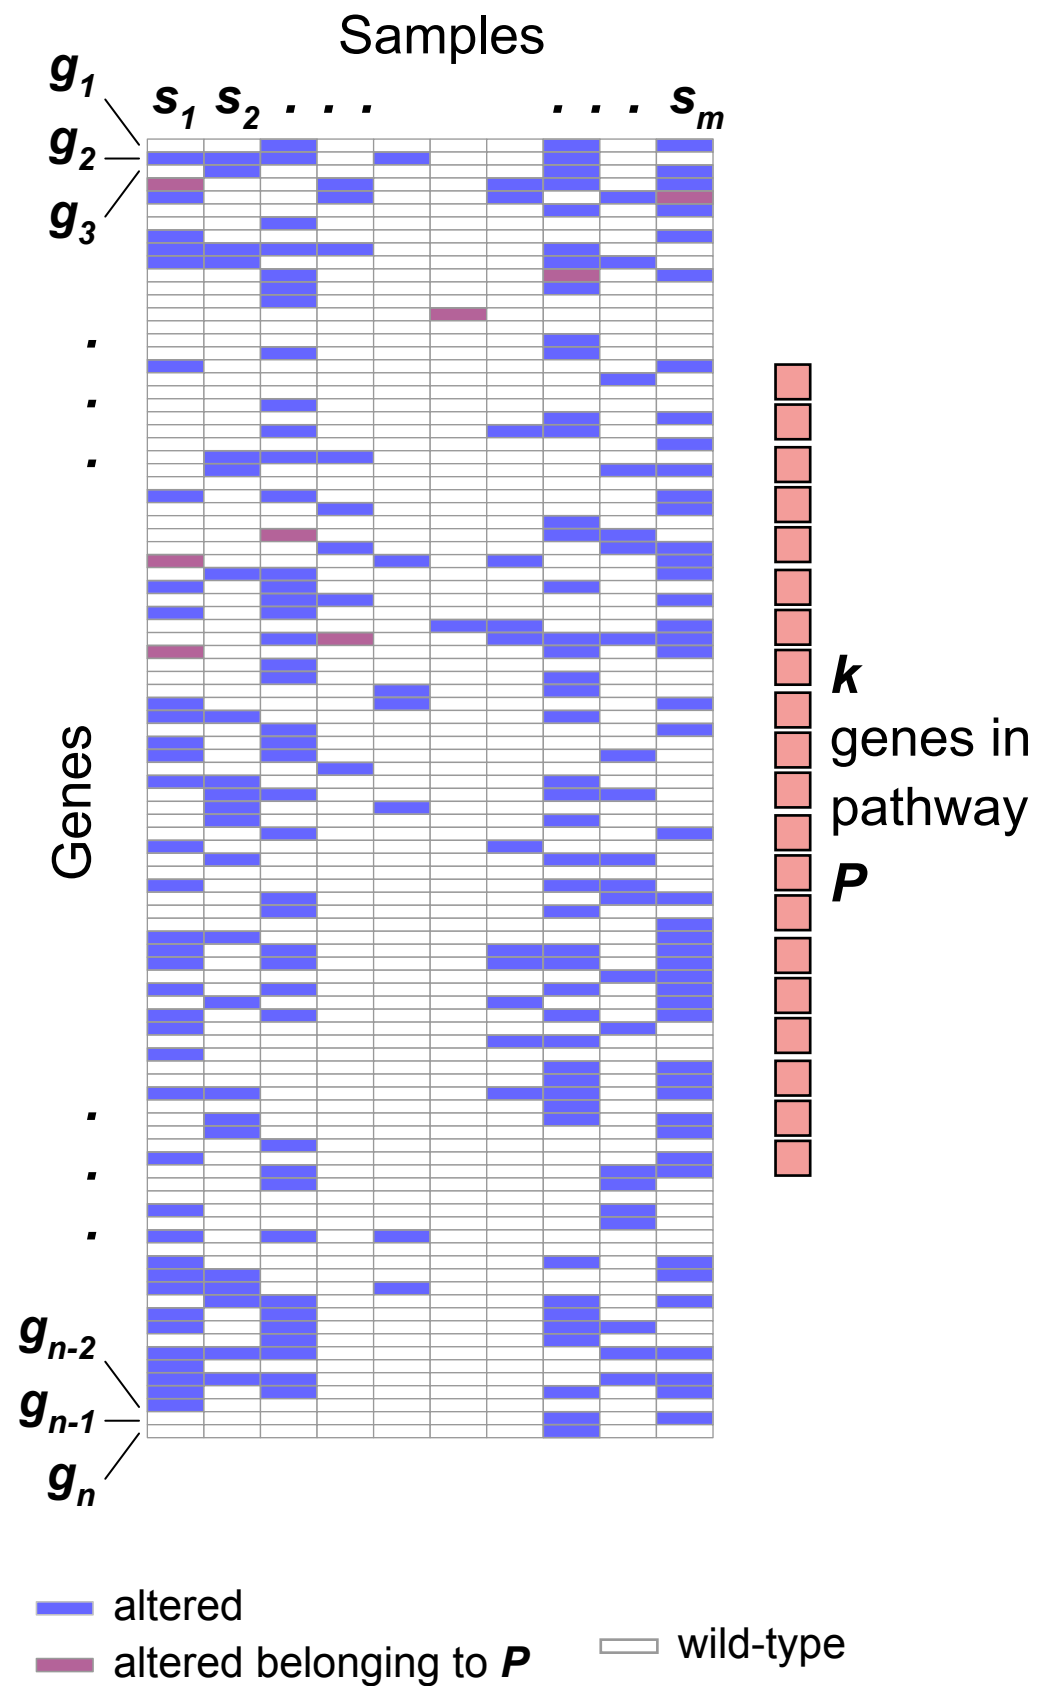**B**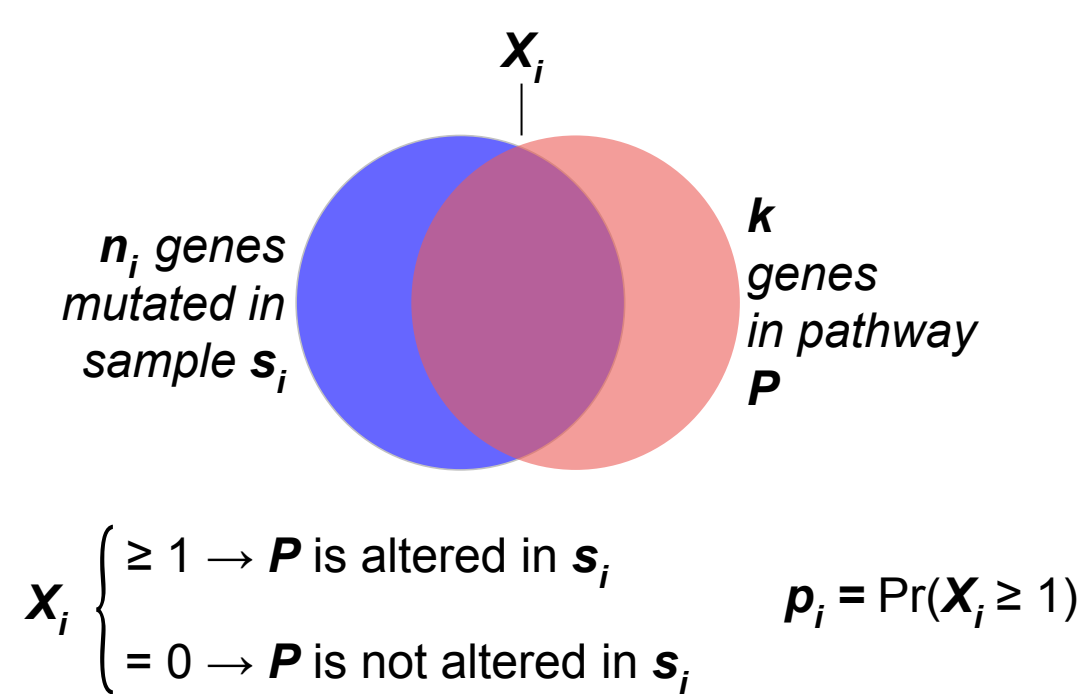**C**

number of samples where  $P$  is altered:  
Poisson binomial  $\pi$  with success probabilities  $\{p_i\}$

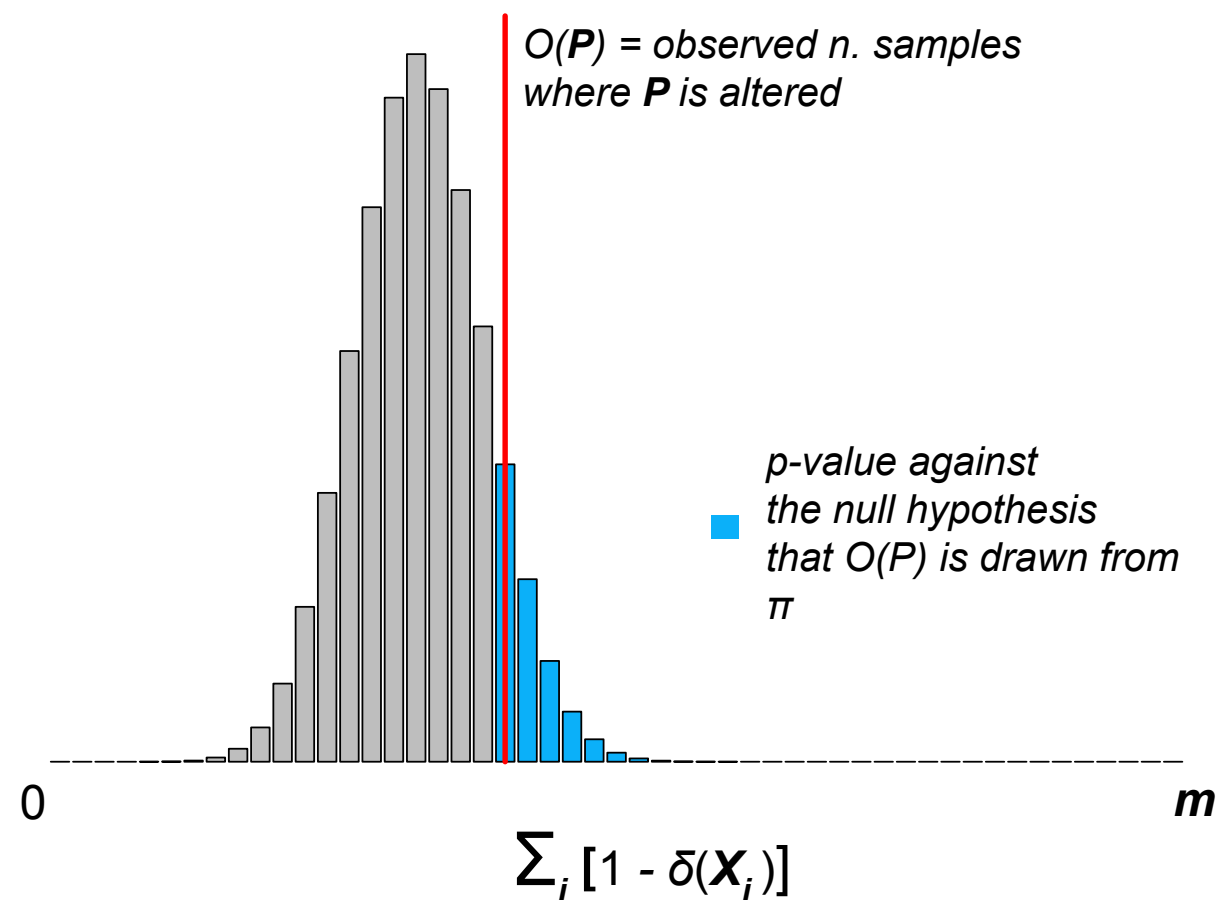

Supplement: Supplementary file [file 077701-1.pdf]
